# Supplementary material for: Gut microbiome transition across a lifestyle gradient in Himalaya
Source: PubMed Central journal article supplement (PMC6237292; doi:10.1371/journal.pbio.2005396), 2018-11-15
Supplement: pbio.2005396.s026.pdf [file pbio.2005396.s026.pdf]

## यस् अध्ययनको नेपालीमा सारांश

मानवीय आन्द्रामा धेरै प्रकारका सुक्ष्म जीवाणुहरूले बास गरेका हुन्छन्। यी जीवाणुहरूको उपस्थिती मानिसको स्वास्थ्यका लागि निक्कै महत्वपूर्ण हुन्छ भन्ने बैज्ञानिक मान्यता छ। औद्योगिक राष्ट्रमा बसोबास गर्ने मानिसको आन्द्रामा रहेका जीवाणुहरूको रचना पारम्परिक जीवनशैली व्यतीत गर्ने मानवहरूको भन्दा धेरै भिन्न हुन्छ। तर यी भिन्नताहरूमा आणुवंशिक, भौगोलिक, र जीवनशैलीले के कस्ता योगदान गर्छन् भन्ने थाहा पाउन सकिएको छैन।

२००,००० बर्ष अघि आफ्रिकामा उत्पत्ती भए पछि मानव ईतिहासका हज्जारौं बर्ष मानिसले जंगलबाट खानेकुरा बटुलेर आफ्नो जीवन गुजरा गर्‍यो। १०,००० बर्ष अगाडि मानिसले कृषि गर्न सिक्‍यो र त्यसपछि भ्रमणशील जीवनशैली त्यागेर एकै ठाउँमा बसोबास गर्न थाल्यो। यसैगरी १००-२०० बर्ष अघि मानिसहरूले औद्योगिक जीवन अपनाउन थालेका छन्। जडलमा निर्भर हुने अवस्थाबाट अन्य प्रकारका जीवनशैली अपनाउन थालेपछि मानिसको जीवनशैलीमा आएका परिवर्तनहरूले मानिसको आन्द्रामा हुने सुक्ष्म जीवाणुहरूमा के कस्ता असर परेका छन् थाहा भाईसकेको छैन। त्यसैले हामीले पारम्परिक जीवनशैलीहरूको परिवर्तन साथै आन्द्राको जीवाणुहरूको रचनामा के कस्ता उतार-चढावहरू आउँदा रहेछन भन्ने कुराको अनुसन्धान गर्न हिमालयमा बस्ने चार जनजातिहरूको आन्द्राका ब्याक्टेरियाहरूको अध्ययन गरेका छौं। यी चार हिमाली समुदायहरू - चेपाँग, राउटे, राजी, र थारु - कृषि पेशामा निर्भर हुनुभन्दाअघि अर्धभ्रमणशील जीवनशैली व्यतित गर्दै जडलमा खानेकुराहरूको शिकार र संकलन गर्दथे। थारुहरू २५०-३०० बर्ष अघि तथा राउटे र राजी ३०-४० बर्ष अघि कृषि पेशामा संलग्न हुन थालेका हुन् भने चेपाँङहरू अझैपनी जडलमा निर्भर हुने हुनाले उनिहरूले आफ्नो परम्परागत जीवनशैलीका धेरै पक्षहरू अझैसम्मपनि कायमै राखेका छन्।

यस् अध्ययनमा हामीले मानिसको अहार तथा पर्यावरणका विभिन्न कारणहरूले कसरी उनिहरूका आन्द्राका जीवाणुहरूलाई असर गर्छन् भन्ने कुराको मुल्याङ्कन गर्दा चेपाँङ र थारुहरूको जीवनशैलीमा पाइएका अन्तरहरूले उनिहरूको आन्द्राका जीवाणुहरूको रचनालाई निक्कै प्रभाव पार्नसक्ने पाएका छौं। हिमालयमा वसोवास गर्दै आएका यी चारै समुदायहरूको आन्द्राका जीवाणुहरू अमेरिकनहरूको भन्दा भिन्नै पाइएको छ जसले के जनाउँछ भने औद्योगिकरणले आन्द्राका जीवाणुहरूमा थप भिन्नताहरूको श्रीजना गर्नसक्छ। हिमालयमा अर्धभ्रमणशील जीवनयापन गर्दै आएका चेपाँङहरूमा संसारका अन्य पारम्परिक शिकारी जीवनशैली व्यतित गर्ने मानव समुदायहरूमा पाइने जस्ता जीवाणुहरू अधिकमात्रामा पाइएको छ। विपरीततः कृषि पेशामा पूर्ण रूपमा परिवर्तित भईसकेको समुदायको आन्द्रामा पाइने जीवाणुहरू भने औद्योगिक राष्ट्र अमेरिकामा बस्ने मानव समुदायहरूसँग बढी मिल्दो जुल्दो पाइएको छ। राउटे र राजीका आन्द्राका जीवाणुहरू चेपाँङ र थारुहरूको बीचको अवस्थामा छन् जसले के देखाउँछ भने परम्परागत अवस्थाबाट आन्द्राको जीवाणुहरूको बिचलन हुन धेरै समय लाग्दैन। यसरी आन्द्राको जीवाणुहरूको रचनामा परम्परागत अवस्थाबाट बिचलन हुनुमा खाने पानी तथा खाना पकाउने ईन्धन जस्ता पर्यावरणसँग सम्बन्धित विभिन्न कारकहरूको पनि भूमिका हुनसक्ने देखिएको छ। यसरी विभिन्न किसिमका रहनसहन भएका मानव समुदायहरूका जीवाणुहरूको रचनामा स्पष्ट अन्तरहरू देखिएता पनि उनिहरूका आन्द्रामा भएका जीवाणुहरूका सन्ख्यामा भने उत्ती फरक देखिएन।

समग्रमा, एउटै भौगोलिक क्षेत्रमा उस्ता उस्तै जीवनशैली व्यतीत गर्दै आएका यी चार नेपाली आदिवासी समुदायहरूमा भएको यस् अध्ययनले मानिसको जीवनशैलीले आन्द्रामा भएका जीवाणुहरूको रचनामा निक्कै प्रभाव पार्छन भन्ने स्पष्टरूपमा देखाएको छ र साथै जीवनशैलीको परिवर्तनले आन्द्राका जीवाणुहरूमा ल्याउने अन्तरहरूले मानिसको स्वास्थ्यमा के कस्ता प्रभाव पार्न सक्छन भन्ने चुनौतिपूर्ण कदमहरू चाल्न अत्यन्त आवश्यक भएको देखाएको छ।
